# Supplementary material for: A Forward Genetic Screen for Molecules Involved in Pheromone-Induced Dauer Formation in Caenorhabditis elegans
Source: PubMed Central journal article supplement (PMC4856098; doi:10.1534/g3.115.026450), 2016-03-10
Supplement: supp_g3.115.026450_026450SM.pdf [file supp_g3.115.026450_026450SM.pdf]

## SUPPLEMENTAL MATERIAL

### Supplemental Figure Legends

**Figure S1.** Expression of *daf-7p::gfp* is unaffected in *maco-1* mutants. Shown are representative images of *daf-7p::gfp* expression in ASI neurons (arrows) of wild-type and *maco-1(ok3165)* animals. In red are cells filled with DiI. Scale bar: 5  $\mu$ m.

**Figure S2.** Expression patterns of *ttbkp::gfp* fusion genes. Shown are representative images of the heads of animals expressing the indicated transcriptional fusion genes. A schematic of sensory neurons filling with DiI (red) is shown at top. White and yellow arrows indicate ASI and ASK cell bodies, respectively. Expression of the coinjection marker in the process of the I5 neuron is indicated with a white arrowhead. Anterior is at left. Scale: 5  $\mu$ m.

**Figure S3.** ASK and ASI cellular and cilia morphologies are unaffected in *ttbk-3* and *ttbk-4* mutants.

Representative images of ASK and ASI neurons visualized using cell-specific reporters. Soma, dendrites and cilia are indicated by white arrows, white arrowheads and yellow arrowheads, respectively. Anterior is at left. Scale bar: 10  $\mu$ m.

**Table S1.** List of strains used in this work.

| Strain  | Genotype                                                                                   | Source and/or parent strains <sup>a</sup> | Relevant Tables and Figures                          |
|---------|--------------------------------------------------------------------------------------------|-------------------------------------------|------------------------------------------------------|
| WT      | N2 (Bristol)                                                                               | CGC                                       | Tables 1, S2; Figs 2, 3B, 3E, 3F, 4B, 4C, 4E, 5B, 5C |
| CX3596  | <i>kyIs128(str-3p::gfp; lin-15+)</i> X                                                     | (Peckol <i>et al.</i> 2001)               | Tables 1, S2; Figs 2, 3C, 5E, S3                     |
| PY6561  | <i>srbc-64(tm1946)</i> I; <i>srbc-66(tm2943)</i> V                                         | (Kim <i>et al.</i> 2009)                  | Tables 1, S2; Fig 2, 4E                              |
| KHK742  | <i>srbc-64(tm1946)</i> I; <i>srbc-66(tm2943)</i> V; <i>kyIs128(str-3p::gfp; lin-15+)</i> X | PY6561, CX3596                            | Table 1                                              |
| KHK787  | <i>srg-36 srg-37(kyIr88)</i> , <i>kyIs128(str-3p::gfp; lin-15+)</i> X                      | PY8244, CX3596                            | Table 1                                              |
| PY8300  | <i>oy103; kyIs128(str-3p::gfp; lin-15+)</i> X                                              | CX3596                                    | Tables 1, S2; Fig 2                                  |
| PY8301  | <i>oy104; kyIs128(str-3p::gfp; lin-15+)</i> X                                              | CX3596                                    | Tables 1, S2; Fig 2                                  |
| PY8302  | <i>oy105; kyIs128(str-3p::gfp; lin-15+)</i> X                                              | CX3596                                    | Tables 1, S2; Figs 2, 4B, 4C                         |
| PY8303  | <i>oy106; kyIs128(str-3p::gfp; lin-15+)</i> X                                              | CX3596                                    | Tables 1, S2; Figs 2, 3B, 3C                         |
| PY8304  | <i>oy107; kyIs128(str-3p::gfp; lin-15+)</i> X                                              | CX3596                                    | Tables 1, S2; Figs 2, 5B                             |
| PY8373  | <i>oy108; kyIs128(str-3p::gfp; lin-15+)</i> X                                              | CX3596                                    | Tables 1, S2; Figs 2, 3E, 3F                         |
| PY10757 | <i>oy109; kyIs128(str-3p::gfp; lin-15+)</i> X                                              | CX3596                                    | Tables 1, S2; Fig 2                                  |
| PY10754 | <i>oy113; kyIs128(str-3p::gfp; lin-15+)</i> X                                              | CX3596                                    | Table 1                                              |
| PY10759 | <i>oy117; kyIs128(str-3p::gfp; lin-15+)</i> X                                              | CX3596                                    | Table 1                                              |
| PY10760 | <i>oy118; kyIs128(str-3p::gfp; lin-15+)</i> X                                              | CX3596                                    | Table 1                                              |
| PY10761 | <i>oy119; kyIs128(str-3p::gfp; lin-15+)</i> X                                              | CX3596                                    | Table 1                                              |
| PY10762 | <i>oy120; kyIs128(str-3p::gfp; lin-15+)</i> X                                              | CX3596                                    | Table 1                                              |
| PY10767 | <i>oy125; kyIs128(str-3p::gfp; lin-15+)</i> X                                              | CX3596                                    | Table 1                                              |
| PY10768 | <i>oy126; kyIs128(str-3p::gfp; lin-15+)</i> X                                              | CX3596                                    | Table 1                                              |
| PY10769 | <i>oy127; kyIs128(str-3p::gfp; lin-15+)</i> X                                              | CX3596                                    | Table 1                                              |

|         |                                                                                                          |                      |                 |
|---------|----------------------------------------------------------------------------------------------------------|----------------------|-----------------|
| PY10771 | <i>oy129; kyls128(str-3p::gfp; lin-15+)</i> X                                                            | CX3596               | Table 1         |
| PY10773 | <i>oy131; kyls128(str-3p::gfp; lin-15+)</i> X                                                            | CX3596               | Table 1         |
| PY10776 | <i>oy134; kyls128(str-3p::gfp; lin-15+)</i> X                                                            | CX3596               | Table 1         |
| PY10777 | <i>oy135; kyls128(str-3p::gfp; lin-15+)</i> X                                                            | CX3596               | Table 1         |
| PY10779 | <i>oy137; kyls128(str-3p::gfp; lin-15+)</i> X                                                            | CX3596               | Table 1         |
| PY10780 | <i>oy138; kyls128(str-3p::gfp; lin-15+)</i> X                                                            | CX3596               | Table 1         |
| PY10781 | <i>oy139; kyls128(str-3p::gfp; lin-15+)</i> X                                                            | CX3596               | Table 1         |
| PY10782 | <i>oy140; kyls128(str-3p::gfp; lin-15+)</i> X                                                            | CX3596               | Table 1         |
| PY10783 | <i>oy141; kyls128(str-3p::gfp; lin-15+)</i> X                                                            | CX3596               | Table 1         |
| PY10784 | <i>oy142; kyls128(str-3p::gfp; lin-15+)</i> X                                                            | CX3596               | Table 1         |
| PY10785 | <i>oy143; kyls128(str-3p::gfp; lin-15+)</i> X                                                            | CX3596               | Table 1         |
| PY10786 | <i>oy144; kyls128(str-3p::gfp; lin-15+)</i> X                                                            | CX3596               | Table 1         |
| PY10792 | <i>oy106; kyls128(str-3p::gfp; lin-15+)</i> X; Ex[ <i>che-12</i> gDNA, <i>unc-122p::gfp</i> ] line 1     | injected into PY8303 | Fig 3B          |
| PY10793 | <i>oy106; kyls128(str-3p::gfp; lin-15+)</i> X; Ex[ <i>che-12</i> gDNA, <i>unc-122p::gfp</i> ] line 2     | injected into PY8303 | Fig 3B          |
| PY10869 | <i>oy106; kyls128(str-3p::gfp; lin-15+)</i> X; Ex[ <i>che-12p::che-12::gfp, unc-122p::dsRed</i> ] line 1 | injected into PY8303 | Fig 3B          |
| PY10870 | <i>oy106; kyls128(str-3p::gfp; lin-15+)</i> X; Ex[ <i>che-12p::che-12::gfp, unc-122p::dsRed</i> ] line 2 | injected into PY8303 | Fig 3B          |
| CB3332  | <i>che-12(e1812)</i> V                                                                                   | CGC                  | Fig 3B          |
| PY10833 | <i>che-12(e1812)</i> V; Ex[ <i>che-12</i> gDNA, <i>unc-122p::gfp</i> ] line 1                            | injected into CB3332 | Fig 3B          |
| PY10834 | <i>che-12(e1812)</i> V; Ex[ <i>che-12</i> gDNA, <i>unc-122p::gfp</i> ] line 2                            | injected into CB3332 | Fig 3B          |
| PY10871 | Ex[ <i>srbc-66p::mCherry, unc-122p::dsRed</i> ]                                                          | injected into WT     | Figs 3C, 5E, S3 |
| PY10872 | <i>oy106; Ex[srbc-66p::mCherry,</i>                                                                      | injected into        | Fig 3C          |

|         |                                                                                                 |                                   |                 |
|---------|-------------------------------------------------------------------------------------------------|-----------------------------------|-----------------|
| PY10873 | <i>unc-122p::dsRed]</i><br><i>che-12(e1812) V; Ex[srbc-66p::mCherry, unc-122p::dsRed]</i>       | PY8303<br>injected into<br>CB3332 | Fig 3C          |
| RB2329  | <i>maco-1(ok3165) I</i>                                                                         | CGC                               | Figs 3E, 3F     |
| PY10796 | <i>oy108; kyIs128(str-3p::gfp; lin-15+) X; Ex[maco-1 gDNA, unc-122p::gfp]</i> line 1            | injected into<br>PY8373           | Figs 3E, 3F     |
| PY10797 | <i>oy108; kyIs128(str-3p::gfp; lin-15+) X; Ex[maco-1 gDNA, unc-122p::gfp]</i> line 2            | injected into<br>PY8373           | Figs 3E, 3F     |
| KHK728  | <i>oy108; kyIs128(str-3p::gfp; lin-15+) X; Ex[srg-47p::maco-1, unc-122p::gfp]</i> line 1        | injected into<br>PY8373           | Figs 3E, 3F     |
| KHK729  | <i>oy108; kyIs128(str-3p::gfp; lin-15+) X; Ex[srg-47p::maco-1, unc-122p::gfp]</i> line 2        | injected into<br>PY8373           | Figs 3E, 3F     |
| KHK733  | <i>oy108; kyIs128(str-3p::gfp; lin-15+) X; Ex[sra-9p::maco-1, unc-122p::gfp]</i> line 1         | injected into<br>PY8373           | Figs 3E, 3F     |
| KHK734  | <i>oy108; kyIs128(str-3p::gfp; lin-15+) X; Ex[sra-9p::maco-1, unc-122p::gfp]</i> line 2         | injected into<br>PY8373           | Figs 3E, 3F     |
| KHK739  | <i>oy108; kyIs128(str-3p::gfp; lin-15+) X; Ex[trx-1p::maco-1, unc-122p::gfp]</i> line 1         | injected into<br>PY8373           | Figs 3E, 3F     |
| KHK740  | <i>oy108; kyIs128(str-3p::gfp; lin-15+) X; Ex[trx-1p::maco-1, unc-122p::gfp]</i> line 2         | injected into<br>PY8373           | Figs 3E, 3F     |
| PY10798 | <i>qui-1(gb404) IV</i>                                                                          | outcrossed from<br>NA404          | Figs 4B, 4C, 4E |
| PY10790 | <i>oy105; kyIs128(str-3p::gfp; lin-15+) X; Ex[qui-1 gDNA, unc-122p::gfp]</i> line 1             | injected into<br>PY8302           | Figs 4B, 4C     |
| PY10791 | <i>oy105; kyIs128(str-3p::gfp; lin-15+) X; Ex[qui-1 gDNA, unc-122p::gfp]</i> line 2             | injected into<br>PY8302           | Figs 4B, 4C     |
| PY8377  | <i>oy105; kyIs128(str-3p::gfp; lin-15+) X; Ex[sra-6p::qui-1, unc-122p::gfp]</i> line 1          | injected into<br>PY8302           | Figs 4B, 4C     |
| PY8378  | <i>oy105; kyIs128(str-3p::gfp; lin-15+) X; Ex[sre-1Δp::qui-1, unc-122p::gfp]</i> line 1         | injected into<br>PY8302           | Figs 4B, 4C     |
| PY8379  | <i>oy105; kyIs128(str-3p::gfp; lin-15+) X; Ex[sra-6p::qui-1, sre-1Δp::qui-1, unc-122p::gfp]</i> | injected into<br>PY8302           | Figs 4B, 4C     |

|         |                                                                                                        |                       |             |
|---------|--------------------------------------------------------------------------------------------------------|-----------------------|-------------|
|         | line 1                                                                                                 |                       |             |
| PY8376  | <i>oy105; kyIs128(str-3p::gfp; lin-15+)</i> X; Ex[ <i>sra-9p::qui-1, unc-122p::gfp</i> ] line 1        | injected into PY8302  | Figs 4B, 4C |
| KHK741  | Ex[ <i>sra-6p::qui-1::mCherry, rol-6(su1006)</i> ]                                                     | injected into WT      | Fig 4D      |
| PY10794 | <i>oy107; kyIs128(str-3p::gfp; lin-15+)</i> X; Ex[ <i>F32B6.10</i> gDNA, <i>unc-122p::gfp</i> ] line 1 | injected into PY8304  | Fig 5B      |
| PY10795 | <i>oy107; kyIs128(str-3p::gfp; lin-15+)</i> X; Ex[ <i>F32B6.10</i> gDNA, <i>unc-122p::gfp</i> ] line 2 | injected into PY8304  | Fig 5B      |
| PY10799 | <i>ttbk-3/F32B6.10(tm4006)</i> IV                                                                      | NBRP                  | Figs 5B, 5C |
| PY10800 | <i>ttbk-4/W01B6.2(tm4134)</i> IV                                                                       | NBRP                  | Figs 5B, 5C |
| PY10801 | <i>ttbk-5/C04G2.2(tm3841)</i> IV                                                                       | NBRP                  | Fig 5B      |
| VC2697  | <i>ttbk-6/C45G9.1(gk1235)</i> III                                                                      | CGC                   | Fig 5B      |
| PY10802 | <i>ttbk-7/R90.1(tm4852)</i> V                                                                          | NBRP                  | Fig 5B      |
| PY10874 | <i>ttbk-3(tm4006)</i> IV; Ex[ <i>sra-9p::ttbk-3::gfp</i> (1 ng/μl), <i>unc-122p::dsRed</i> ] line 1    | injected into PY10799 | Fig 5C      |
| PY10875 | <i>ttbk-3(tm4006)</i> IV; Ex[ <i>sra-9p::ttbk-3::gfp</i> (1 ng/μl), <i>unc-122p::dsRed</i> ] line 2    | injected into PY10799 | Fig 5C      |
| PY10876 | <i>ttbk-3(tm4006)</i> IV; Ex[ <i>srg-47p::ttbk-3::gfp</i> (1 ng/μl), <i>unc-122p::dsRed</i> ] line 1   | injected into PY10799 | Fig 5C      |
| PY10877 | <i>ttbk-3(tm4006)</i> IV; Ex[ <i>srg-47p::ttbk-3::gfp</i> (1 ng/μl), <i>unc-122p::dsRed</i> ] line 2   | injected into PY10799 | Fig 5C      |
| PY10878 | <i>ttbk-3(tm4006)</i> IV; Ex[ <i>ceh-36p::ttbk-3::gfp</i> (1 ng/μl), <i>unc-122p::dsRed</i> ] line 1   | injected into PY10799 | Fig 5C      |
| PY10879 | <i>ttbk-3(tm4006)</i> IV; Ex[ <i>ceh-36p::ttbk-3::gfp</i> (1 ng/μl), <i>unc-122p::dsRed</i> ] line 2   | injected into PY10799 | Fig 5C      |
| PY10880 | <i>ttbk-4(tm4134)</i> IV; Ex[ <i>sra-9p::ttbk-4::gfp</i> (1 ng/μl), <i>unc-122p::dsRed</i> ] line 1    | injected into PY10800 | Fig 5C      |
| PY10881 | <i>ttbk-4(tm4134)</i> IV; Ex[ <i>sra-9p::ttbk-4::gfp</i> (1 ng/μl), <i>unc-122p::dsRed</i> ] line 2    | injected into PY10800 | Fig 5C      |
| PY10882 | <i>ttbk-4(tm4134)</i> IV; Ex[ <i>srg-47p::ttbk-4::gfp</i> (1 ng/μl), <i>unc-122p::dsRed</i> ] line 1   | injected into PY10800 | Fig 5C      |
| PY10883 | <i>ttbk-4(tm4134)</i> IV; Ex[ <i>srg-47p::ttbk-4::gfp</i> (1 ng/μl), <i>unc-</i>                       | injected into PY10800 | Fig 5C      |

|         |                                                                                                      |                       |             |
|---------|------------------------------------------------------------------------------------------------------|-----------------------|-------------|
|         | <i>122p::dsRed</i> ] line 2                                                                          |                       |             |
| PY10884 | <i>ttbk-4(tm4134)</i> IV; Ex[ <i>ceh-36p::ttbk-4::gfp</i> (1 ng/μl), <i>unc-122p::dsRed</i> ] line 1 | injected into PY10800 | Fig 5C      |
| PY10885 | <i>ttbk-4(tm4134)</i> IV; Ex[ <i>ceh-36p::ttbk-4::gfp</i> (1 ng/μl), <i>unc-122p::dsRed</i> ] line 2 | injected into PY10800 | Fig 5C      |
| PY10886 | Ex[ <i>sra-9p::ttbk-3::gfp</i> (15 ng/μl), <i>unc-122p::gfp</i> ]                                    | injected into WT      | Fig 5D      |
| PY10888 | Ex[ <i>sra-9p::ttbk-4::gfp</i> (15 ng/μl), <i>unc-122p::gfp</i> ]                                    | injected into WT      | Fig 5D      |
| PY10890 | <i>ttbk-3(tm4006)</i> IV; Ex[ <i>srbc-66p::mCherry</i> , <i>unc-122p::dsRed</i> ]                    | injected into PY10799 | Figs 5E, S3 |
| PY10891 | <i>ttbk-4(tm4134)</i> IV; Ex[ <i>srbc-66p::mCherry</i> , <i>unc-122p::dsRed</i> ]                    | injected into PY10800 | Figs 5E, S3 |
| PY10892 | <i>ttbk-3(tm4006)</i> IV; <i>kyIs128(str-3p::gfp; lin-15+)</i> X                                     | CX3596, PY10799       | Figs 5E, S3 |
| PY10893 | <i>ttbk-4(tm4134)</i> IV; <i>kyIs128(str-3p::gfp; lin-15+)</i> X                                     | CX3596, PY10800       | Figs 5E, S3 |
| FK181   | <i>ksIs2[daf-7p::gfp, rol-6(su1006)]</i>                                                             | CGC                   | Fig S1      |
| KHK743  | <i>maco-1(ok3165)</i> I; <i>ksIs2[daf-7p::gfp, rol-6(su1006)]</i>                                    | FK181, RB2329         | Fig S1      |
| PY10894 | Ex[ <i>ttbk-3p::gfp, unc-122p::dsRed</i> ]                                                           | injected into WT      | Fig S2      |
| PY10895 | Ex[ <i>ttbk-4p::gfp, unc-122p::dsRed</i> ]                                                           | injected into WT      | Fig S2      |
| PY10896 | Ex[ <i>ttbk-5p::gfp, unc-122p::dsRed</i> ]                                                           | injected into WT      | Fig S2      |
| PY10897 | Ex[ <i>ttbk-6p::gfp, unc-122p::dsRed</i> ]                                                           | injected into WT      | Fig S2      |
| PY10898 | Ex[ <i>ttbk-7p::gfp, unc-122p::dsRed</i> ]                                                           | injected into WT      | Fig S2      |

<sup>a</sup>CGC – *Caenorhabditis* Genetics Center; NBRP – National BioResource Project

**Table S2.** Dauer formation defects of *phd* mutants.

| Strain <sup>a</sup>               | EtOH <sup>c</sup> | Ascaroside <sup>b</sup> |               |               |               |               |               |               |               |               |               |               |               |               |               |               |
|-----------------------------------|-------------------|-------------------------|---------------|---------------|---------------|---------------|---------------|---------------|---------------|---------------|---------------|---------------|---------------|---------------|---------------|---------------|
|                                   |                   | ascr#2 (nM)             |               |               | ascr#3 (nM)   |               |               | ascr#5 (nM)   |               |               | ascr#8 (nM)   |               |               | icas#9 (nM)   |               |               |
|                                   | 0                 | 60                      | 600           | 6000          | 60            | 600           | 6000          | 60            | 600           | 6000          | 6             | 60            | 600           | 6             | 60            | 600           |
| WT                                | 0.03±<br>0.01     | 0.38±<br>0.05           | 0.61±<br>0.06 | 0.79±<br>0.03 | 0.48±<br>0.05 | 0.39±<br>0.04 | 0.82±<br>0.05 | 0.10±<br>0.06 | 0.83±<br>0.04 | 0.93±<br>0.03 | 0.28±<br>0.08 | 0.75±<br>0.07 | 0.87±<br>0.02 | 0.29±<br>0.03 | 0.66±<br>0.05 | 0.25±<br>0.02 |
| <i>kyIs128</i>                    | 0.02±<br>0.00     | 0.41±<br>0.08           | 0.64±<br>0.06 | 0.82±<br>0.01 | 0.48±<br>0.09 | 0.74±<br>0.06 | 0.94±<br>0.01 | 0.16±<br>0.03 | 0.88±<br>0.03 | 0.91±<br>0.04 | 0.39±<br>0.08 | 0.62±<br>0.09 | 0.85±<br>0.05 | 0.40±<br>0.12 | 0.52±<br>0.09 | 0.55±<br>0.20 |
| <i>srbc-64;</i><br><i>srbc-66</i> | 0.00±<br>0.00     | 0.09±<br>0.04           | 0.21±<br>0.08 | 0.33±<br>0.11 | 0.03±<br>0.01 | 0.05±<br>0.02 | 0.34±<br>0.15 | 0.01±<br>0.01 | 0.29±<br>0.15 | 0.62±<br>0.16 | 0.10±<br>0.06 | 0.30±<br>0.09 | 0.51±<br>0.09 | 0.01±<br>0.01 | 0.06±<br>0.04 | 0.07±<br>0.05 |
| <i>oy103</i>                      | 0.00±<br>0.00     | 0.03±<br>0.01           | 0.12±<br>0.03 | 0.28±<br>0.04 | 0.00±<br>0.00 | 0.01±<br>0.00 | 0.12±<br>0.05 | 0.02±<br>0.01 | 0.23±<br>0.13 | 0.79±<br>0.09 | 0.02±<br>0.01 | 0.11±<br>0.07 | 0.24±<br>0.06 | 0.03±<br>0.01 | 0.05±<br>0.01 | 0.02±<br>0.00 |
| <i>oy104</i>                      | 0.00±<br>0.00     | 0.12±<br>0.05           | 0.36±<br>0.07 | 0.29±<br>0.04 | 0.00±<br>0.00 | 0.00±<br>0.00 | 0.05±<br>0.02 | 0.00±<br>0.00 | 0.39±<br>0.20 | 0.65±<br>0.18 | 0.05±<br>0.04 | 0.38±<br>0.14 | 0.66±<br>0.09 | 0.01±<br>0.01 | 0.03±<br>0.02 | 0.01±<br>0.00 |
| <i>oy105</i>                      | 0.08±<br>0.03     | 0.22±<br>0.09           | 0.18±<br>0.10 | 0.25±<br>0.10 | 0.10±<br>0.02 | 0.15±<br>0.06 | 0.29±<br>0.16 | 0.05±<br>0.03 | 0.31±<br>0.17 | 0.39±<br>0.16 | 0.33±<br>0.17 | 0.44±<br>0.12 | 0.58±<br>0.15 | 0.09±<br>0.03 | 0.38±<br>0.13 | 0.24±<br>0.11 |
| <i>oy106</i>                      | 0.02±<br>0.02     | 0.02±<br>0.01           | 0.04±<br>0.01 | 0.20±<br>0.08 | 0.10±<br>0.09 | 0.13±<br>0.10 | 0.31±<br>0.19 | 0.03±<br>0.02 | 0.42±<br>0.07 | 0.80±<br>0.04 | 0.02±<br>0.01 | 0.17±<br>0.08 | 0.54±<br>0.18 | 0.03±<br>0.01 | 0.14±<br>0.06 | 0.39±<br>0.14 |
| <i>oy107</i>                      | 0.00±<br>0.00     | 0.13±<br>0.06           | 0.23±<br>0.06 | 0.34±<br>0.12 | 0.02±<br>0.02 | 0.16±<br>0.06 | 0.41±<br>0.09 | 0.02±<br>0.01 | 0.29±<br>0.15 | 0.70±<br>0.13 | 0.19±<br>0.06 | 0.41±<br>0.06 | 0.60±<br>0.08 | 0.06±<br>0.02 | 0.17±<br>0.02 | 0.10±<br>0.03 |
| <i>oy108</i>                      | 0.03±<br>0.01     | 0.15±<br>0.07           | 0.10±<br>0.04 | 0.29±<br>0.11 | 0.04±<br>0.02 | 0.07±<br>0.06 | 0.33±<br>0.22 | 0.13±<br>0.09 | 0.20±<br>0.09 | 0.54±<br>0.15 | 0.02±<br>0.01 | 0.35±<br>0.17 | 0.38±<br>0.16 | 0.00±<br>0.00 | 0.11±<br>0.08 | 0.03±<br>0.02 |
| <i>oy109</i>                      | 0.04±<br>0.03     | 0.02±<br>0.02           | 0.02±<br>0.01 | 0.04±<br>0.02 | 0.02±<br>0.01 | 0.02±<br>0.00 | 0.04±<br>0.01 | 0.06±<br>0.04 | 0.03±<br>0.01 | 0.07±<br>0.03 | 0.02±<br>0.01 | 0.03±<br>0.01 | 0.10±<br>0.04 | 0.02±<br>0.01 | 0.03±<br>0.00 | 0.01±<br>0.00 |

<sup>a</sup>All strains, except WT and *srbc-64; srbc-66*, contain stably integrated copies of the *str-3p::gfp* fusion gene (*kyIs128*).

<sup>b</sup>Shown are the mean±SEM proportion of dauers formed for the given strains and conditions at 25°C. Data are from at least 3 biologically independent trials of 40-110 animals per assay, with at least 2 technical replicates in each trial.

<sup>c</sup>Ethanol was used as the diluent for all tested ascarosides compounds.

**Table S3.** Whole genome resequencing metrics.

| Metric                                 | Strain       |              |              |              |              |              |              |
|----------------------------------------|--------------|--------------|--------------|--------------|--------------|--------------|--------------|
|                                        | <i>oy103</i> | <i>oy104</i> | <i>oy105</i> | <i>oy106</i> | <i>oy107</i> | <i>oy108</i> | <i>oy109</i> |
| Average genome coverage <sup>a</sup>   | 29.7X        | 33.2X        | 23.1X        | 23.3X        | 32.6X        | 33.8X        | 36.8X        |
| Variants <sup>b</sup>                  | 3659         | 3783         | 3783         | 3767         | 3735         | 3670         | 4441         |
| Genic variants <sup>c</sup>            | 317          | 345          | 341          | 312          | 370          | 244          | 356          |
| Unique coding variants <sup>d</sup>    | 102          | 118          | 129          | 97           | 148          | 31           | 132          |
| Unique nonsense mutations <sup>e</sup> | 4            | 3            | 8            | 3            | 3            | 0            | 3            |
| Unique uncovered regions <sup>f</sup>  | 1            | 2            | 13           | 12           | 14           | 18           | 230          |

<sup>a</sup>Average depth of read coverage across unique regions in the genome.

<sup>b</sup>Total number of detected variants with respect to the N2 reference genome, including genic and intergenic regions. Only those variants that are supported by at least five overlapping consensus reads are reported in all cases.

<sup>c</sup>Variants in genic regions.

<sup>d</sup>Unique variants in coding regions present in individual genomes.

<sup>e</sup>Unique variants predicted to encode a premature termination codon in at least one isoform of a given locus in individual genomes.

<sup>f</sup>Genic regions lacking coverage in a given strain, but which are covered by reads in other sequenced strains.

## REFERENCES

- Kim, K., K. Sato, M. Shibuya, D. M. Zeiger, R. A. Butcher *et al.*, 2009 Two chemoreceptors mediate developmental effects of dauer pheromone in *C. elegans*. *Science* **326**: 994-998.
- Peckol, E. L., E. R. Troemel and C. I. Bargmann, 2001 Sensory experience and sensory activity regulate chemosensory receptor gene expression in *C. elegans*. *Proc. Natl. Acad. Sci. USA* **98**: 11032-11038.
