# Supplementary material for: A Forward Genetic Screen for Molecules Involved in Pheromone-Induced Dauer Formation in Caenorhabditis elegans
Source: PubMed Central journal article supplement (PMC4856098; doi:10.1534/g3.115.026450), 2016-03-10
Supplement: supp_g3.115.026450_TableS1.pdf [file supp_g3.115.026450_TableS1.pdf]

**Table S1.** List of strains used in this work.

| Strain  | Genotype                                                                     | Source and/or parent strains <sup>a</sup> | Relevant Tables and Figures                          |
|---------|------------------------------------------------------------------------------|-------------------------------------------|------------------------------------------------------|
| WT      | N2 (Bristol)                                                                 | CGC                                       | Tables 1, S2; Figs 2, 3B, 3E, 3F, 4B, 4C, 4E, 5B, 5C |
| CX3596  | <i>kyIs128(str-3p::gfp; lin-15+)</i> X                                       | (Peckol <i>et al.</i> 2001)               | Tables 1, S2; Figs 2, 3C, 5E, S3                     |
| PY6561  | <i>srbc-64(tm1946) I; srbc-66(tm2943) V</i>                                  | (Kim <i>et al.</i> 2009)                  | Tables 1, S2; Fig 2, 4E                              |
| KHK742  | <i>srbc-64(tm1946) I; srbc-66(tm2943) V; kyIs128(str-3p::gfp; lin-15+) X</i> | PY6561, CX3596                            | Table 1                                              |
| KHK787  | <i>srg-36 srg-37(kyIr88), kyIs128(str-3p::gfp; lin-15+) X</i>                | PY8244, CX3596                            | Table 1                                              |
| PY8300  | <i>oy103; kyIs128(str-3p::gfp; lin-15+) X</i>                                | CX3596                                    | Tables 1, S2; Fig 2                                  |
| PY8301  | <i>oy104; kyIs128(str-3p::gfp; lin-15+) X</i>                                | CX3596                                    | Tables 1, S2; Fig 2                                  |
| PY8302  | <i>oy105; kyIs128(str-3p::gfp; lin-15+) X</i>                                | CX3596                                    | Tables 1, S2; Figs 2, 4B, 4C                         |
| PY8303  | <i>oy106; kyIs128(str-3p::gfp; lin-15+) X</i>                                | CX3596                                    | Tables 1, S2; Figs 2, 3B, 3C                         |
| PY8304  | <i>oy107; kyIs128(str-3p::gfp; lin-15+) X</i>                                | CX3596                                    | Tables 1, S2; Figs 2, 5B                             |
| PY8373  | <i>oy108; kyIs128(str-3p::gfp; lin-15+) X</i>                                | CX3596                                    | Tables 1, S2; Figs 2, 3E, 3F                         |
| PY10757 | <i>oy109; kyIs128(str-3p::gfp; lin-15+) X</i>                                | CX3596                                    | Tables 1, S2; Fig 2                                  |
| PY10754 | <i>oy113; kyIs128(str-3p::gfp; lin-15+) X</i>                                | CX3596                                    | Table 1                                              |
| PY10759 | <i>oy117; kyIs128(str-3p::gfp; lin-15+) X</i>                                | CX3596                                    | Table 1                                              |
| PY10760 | <i>oy118; kyIs128(str-3p::gfp; lin-15+) X</i>                                | CX3596                                    | Table 1                                              |
| PY10761 | <i>oy119; kyIs128(str-3p::gfp; lin-15+) X</i>                                | CX3596                                    | Table 1                                              |
| PY10762 | <i>oy120; kyIs128(str-3p::gfp; lin-15+) X</i>                                | CX3596                                    | Table 1                                              |
| PY10767 | <i>oy125; kyIs128(str-3p::gfp; lin-15+) X</i>                                | CX3596                                    | Table 1                                              |
| PY10768 | <i>oy126; kyIs128(str-3p::gfp; lin-15+) X</i>                                | CX3596                                    | Table 1                                              |
| PY10769 | <i>oy127; kyIs128(str-3p::gfp; lin-15+) X</i>                                | CX3596                                    | Table 1                                              |

|         |                                                                                                          |                      |                 |
|---------|----------------------------------------------------------------------------------------------------------|----------------------|-----------------|
| PY10771 | <i>oy129; kyls128(str-3p::gfp; lin-15+)</i> X                                                            | CX3596               | Table 1         |
| PY10773 | <i>oy131; kyls128(str-3p::gfp; lin-15+)</i> X                                                            | CX3596               | Table 1         |
| PY10776 | <i>oy134; kyls128(str-3p::gfp; lin-15+)</i> X                                                            | CX3596               | Table 1         |
| PY10777 | <i>oy135; kyls128(str-3p::gfp; lin-15+)</i> X                                                            | CX3596               | Table 1         |
| PY10779 | <i>oy137; kyls128(str-3p::gfp; lin-15+)</i> X                                                            | CX3596               | Table 1         |
| PY10780 | <i>oy138; kyls128(str-3p::gfp; lin-15+)</i> X                                                            | CX3596               | Table 1         |
| PY10781 | <i>oy139; kyls128(str-3p::gfp; lin-15+)</i> X                                                            | CX3596               | Table 1         |
| PY10782 | <i>oy140; kyls128(str-3p::gfp; lin-15+)</i> X                                                            | CX3596               | Table 1         |
| PY10783 | <i>oy141; kyls128(str-3p::gfp; lin-15+)</i> X                                                            | CX3596               | Table 1         |
| PY10784 | <i>oy142; kyls128(str-3p::gfp; lin-15+)</i> X                                                            | CX3596               | Table 1         |
| PY10785 | <i>oy143; kyls128(str-3p::gfp; lin-15+)</i> X                                                            | CX3596               | Table 1         |
| PY10786 | <i>oy144; kyls128(str-3p::gfp; lin-15+)</i> X                                                            | CX3596               | Table 1         |
| PY10792 | <i>oy106; kyls128(str-3p::gfp; lin-15+)</i> X; Ex[ <i>che-12</i> gDNA, <i>unc-122p::gfp</i> ] line 1     | injected into PY8303 | Fig 3B          |
| PY10793 | <i>oy106; kyls128(str-3p::gfp; lin-15+)</i> X; Ex[ <i>che-12</i> gDNA, <i>unc-122p::gfp</i> ] line 2     | injected into PY8303 | Fig 3B          |
| PY10869 | <i>oy106; kyls128(str-3p::gfp; lin-15+)</i> X; Ex[ <i>che-12p::che-12::gfp, unc-122p::dsRed</i> ] line 1 | injected into PY8303 | Fig 3B          |
| PY10870 | <i>oy106; kyls128(str-3p::gfp; lin-15+)</i> X; Ex[ <i>che-12p::che-12::gfp, unc-122p::dsRed</i> ] line 2 | injected into PY8303 | Fig 3B          |
| CB3332  | <i>che-12(e1812)</i> V                                                                                   | CGC                  | Fig 3B          |
| PY10833 | <i>che-12(e1812)</i> V; Ex[ <i>che-12</i> gDNA, <i>unc-122p::gfp</i> ] line 1                            | injected into CB3332 | Fig 3B          |
| PY10834 | <i>che-12(e1812)</i> V; Ex[ <i>che-12</i> gDNA, <i>unc-122p::gfp</i> ] line 2                            | injected into CB3332 | Fig 3B          |
| PY10871 | Ex[ <i>srbc-66p::mCherry, unc-122p::dsRed</i> ]                                                          | injected into WT     | Figs 3C, 5E, S3 |
| PY10872 | <i>oy106; Ex[srbc-66p::mCherry,</i>                                                                      | injected into        | Fig 3C          |

|         |                                                                                                 |                                   |                 |
|---------|-------------------------------------------------------------------------------------------------|-----------------------------------|-----------------|
| PY10873 | <i>unc-122p::dsRed]</i><br><i>che-12(e1812) V; Ex[srbc-66p::mCherry, unc-122p::dsRed]</i>       | PY8303<br>injected into<br>CB3332 | Fig 3C          |
| RB2329  | <i>maco-1(ok3165) I</i>                                                                         | CGC                               | Figs 3E, 3F     |
| PY10796 | <i>oy108; kyIs128(str-3p::gfp; lin-15+) X; Ex[maco-1 gDNA, unc-122p::gfp]</i> line 1            | injected into<br>PY8373           | Figs 3E, 3F     |
| PY10797 | <i>oy108; kyIs128(str-3p::gfp; lin-15+) X; Ex[maco-1 gDNA, unc-122p::gfp]</i> line 2            | injected into<br>PY8373           | Figs 3E, 3F     |
| KHK728  | <i>oy108; kyIs128(str-3p::gfp; lin-15+) X; Ex[srg-47p::maco-1, unc-122p::gfp]</i> line 1        | injected into<br>PY8373           | Figs 3E, 3F     |
| KHK729  | <i>oy108; kyIs128(str-3p::gfp; lin-15+) X; Ex[srg-47p::maco-1, unc-122p::gfp]</i> line 2        | injected into<br>PY8373           | Figs 3E, 3F     |
| KHK733  | <i>oy108; kyIs128(str-3p::gfp; lin-15+) X; Ex[sra-9p::maco-1, unc-122p::gfp]</i> line 1         | injected into<br>PY8373           | Figs 3E, 3F     |
| KHK734  | <i>oy108; kyIs128(str-3p::gfp; lin-15+) X; Ex[sra-9p::maco-1, unc-122p::gfp]</i> line 2         | injected into<br>PY8373           | Figs 3E, 3F     |
| KHK739  | <i>oy108; kyIs128(str-3p::gfp; lin-15+) X; Ex[trx-1p::maco-1, unc-122p::gfp]</i> line 1         | injected into<br>PY8373           | Figs 3E, 3F     |
| KHK740  | <i>oy108; kyIs128(str-3p::gfp; lin-15+) X; Ex[trx-1p::maco-1, unc-122p::gfp]</i> line 2         | injected into<br>PY8373           | Figs 3E, 3F     |
| PY10798 | <i>qui-1(gb404) IV</i>                                                                          | outcrossed from<br>NA404          | Figs 4B, 4C, 4E |
| PY10790 | <i>oy105; kyIs128(str-3p::gfp; lin-15+) X; Ex[qui-1 gDNA, unc-122p::gfp]</i> line 1             | injected into<br>PY8302           | Figs 4B, 4C     |
| PY10791 | <i>oy105; kyIs128(str-3p::gfp; lin-15+) X; Ex[qui-1 gDNA, unc-122p::gfp]</i> line 2             | injected into<br>PY8302           | Figs 4B, 4C     |
| PY8377  | <i>oy105; kyIs128(str-3p::gfp; lin-15+) X; Ex[sra-6p::qui-1, unc-122p::gfp]</i> line 1          | injected into<br>PY8302           | Figs 4B, 4C     |
| PY8378  | <i>oy105; kyIs128(str-3p::gfp; lin-15+) X; Ex[sre-1Δp::qui-1, unc-122p::gfp]</i> line 1         | injected into<br>PY8302           | Figs 4B, 4C     |
| PY8379  | <i>oy105; kyIs128(str-3p::gfp; lin-15+) X; Ex[sra-6p::qui-1, sre-1Δp::qui-1, unc-122p::gfp]</i> | injected into<br>PY8302           | Figs 4B, 4C     |

|         |                                                                                                        |                       |             |
|---------|--------------------------------------------------------------------------------------------------------|-----------------------|-------------|
|         | line 1                                                                                                 |                       |             |
| PY8376  | <i>oy105; kyIs128(str-3p::gfp; lin-15+)</i> X; Ex[ <i>sra-9p::qui-1, unc-122p::gfp</i> ] line 1        | injected into PY8302  | Figs 4B, 4C |
| KHK741  | Ex[ <i>sra-6p::qui-1::mCherry, rol-6(su1006)</i> ]                                                     | injected into WT      | Fig 4D      |
| PY10794 | <i>oy107; kyIs128(str-3p::gfp; lin-15+)</i> X; Ex[ <i>F32B6.10</i> gDNA, <i>unc-122p::gfp</i> ] line 1 | injected into PY8304  | Fig 5B      |
| PY10795 | <i>oy107; kyIs128(str-3p::gfp; lin-15+)</i> X; Ex[ <i>F32B6.10</i> gDNA, <i>unc-122p::gfp</i> ] line 2 | injected into PY8304  | Fig 5B      |
| PY10799 | <i>ttbk-3/F32B6.10(tm4006)</i> IV                                                                      | NBRP                  | Figs 5B, 5C |
| PY10800 | <i>ttbk-4/W01B6.2(tm4134)</i> IV                                                                       | NBRP                  | Figs 5B, 5C |
| PY10801 | <i>ttbk-5/C04G2.2(tm3841)</i> IV                                                                       | NBRP                  | Fig 5B      |
| VC2697  | <i>ttbk-6/C45G9.1(gk1235)</i> III                                                                      | CGC                   | Fig 5B      |
| PY10802 | <i>ttbk-7/R90.1(tm4852)</i> V                                                                          | NBRP                  | Fig 5B      |
| PY10874 | <i>ttbk-3(tm4006)</i> IV; Ex[ <i>sra-9p::ttbk-3::gfp</i> (1 ng/μl), <i>unc-122p::dsRed</i> ] line 1    | injected into PY10799 | Fig 5C      |
| PY10875 | <i>ttbk-3(tm4006)</i> IV; Ex[ <i>sra-9p::ttbk-3::gfp</i> (1 ng/μl), <i>unc-122p::dsRed</i> ] line 2    | injected into PY10799 | Fig 5C      |
| PY10876 | <i>ttbk-3(tm4006)</i> IV; Ex[ <i>srg-47p::ttbk-3::gfp</i> (1 ng/μl), <i>unc-122p::dsRed</i> ] line 1   | injected into PY10799 | Fig 5C      |
| PY10877 | <i>ttbk-3(tm4006)</i> IV; Ex[ <i>srg-47p::ttbk-3::gfp</i> (1 ng/μl), <i>unc-122p::dsRed</i> ] line 2   | injected into PY10799 | Fig 5C      |
| PY10878 | <i>ttbk-3(tm4006)</i> IV; Ex[ <i>ceh-36p::ttbk-3::gfp</i> (1 ng/μl), <i>unc-122p::dsRed</i> ] line 1   | injected into PY10799 | Fig 5C      |
| PY10879 | <i>ttbk-3(tm4006)</i> IV; Ex[ <i>ceh-36p::ttbk-3::gfp</i> (1 ng/μl), <i>unc-122p::dsRed</i> ] line 2   | injected into PY10799 | Fig 5C      |
| PY10880 | <i>ttbk-4(tm4134)</i> IV; Ex[ <i>sra-9p::ttbk-4::gfp</i> (1 ng/μl), <i>unc-122p::dsRed</i> ] line 1    | injected into PY10800 | Fig 5C      |
| PY10881 | <i>ttbk-4(tm4134)</i> IV; Ex[ <i>sra-9p::ttbk-4::gfp</i> (1 ng/μl), <i>unc-122p::dsRed</i> ] line 2    | injected into PY10800 | Fig 5C      |
| PY10882 | <i>ttbk-4(tm4134)</i> IV; Ex[ <i>srg-47p::ttbk-4::gfp</i> (1 ng/μl), <i>unc-122p::dsRed</i> ] line 1   | injected into PY10800 | Fig 5C      |
| PY10883 | <i>ttbk-4(tm4134)</i> IV; Ex[ <i>srg-47p::ttbk-4::gfp</i> (1 ng/μl), <i>unc-</i>                       | injected into PY10800 | Fig 5C      |

|         |                                                                                                      |                       |             |
|---------|------------------------------------------------------------------------------------------------------|-----------------------|-------------|
|         | <i>122p::dsRed</i> ] line 2                                                                          |                       |             |
| PY10884 | <i>ttbk-4(tm4134)</i> IV; Ex[ <i>ceh-36p::ttbk-4::gfp</i> (1 ng/μl), <i>unc-122p::dsRed</i> ] line 1 | injected into PY10800 | Fig 5C      |
| PY10885 | <i>ttbk-4(tm4134)</i> IV; Ex[ <i>ceh-36p::ttbk-4::gfp</i> (1 ng/μl), <i>unc-122p::dsRed</i> ] line 2 | injected into PY10800 | Fig 5C      |
| PY10886 | Ex[ <i>sra-9p::ttbk-3::gfp</i> (15 ng/μl), <i>unc-122p::gfp</i> ]                                    | injected into WT      | Fig 5D      |
| PY10888 | Ex[ <i>sra-9p::ttbk-4::gfp</i> (15 ng/μl), <i>unc-122p::gfp</i> ]                                    | injected into WT      | Fig 5D      |
| PY10890 | <i>ttbk-3(tm4006)</i> IV; Ex[ <i>srbc-66p::mCherry</i> , <i>unc-122p::dsRed</i> ]                    | injected into PY10799 | Figs 5E, S3 |
| PY10891 | <i>ttbk-4(tm4134)</i> IV; Ex[ <i>srbc-66p::mCherry</i> , <i>unc-122p::dsRed</i> ]                    | injected into PY10800 | Figs 5E, S3 |
| PY10892 | <i>ttbk-3(tm4006)</i> IV; <i>kyIs128(str-3p::gfp; lin-15+)</i> X                                     | CX3596, PY10799       | Figs 5E, S3 |
| PY10893 | <i>ttbk-4(tm4134)</i> IV; <i>kyIs128(str-3p::gfp; lin-15+)</i> X                                     | CX3596, PY10800       | Figs 5E, S3 |
| FK181   | <i>ksIs2[daf-7p::gfp, rol-6(su1006)]</i>                                                             | CGC                   | Fig S1      |
| KHK743  | <i>maco-1(ok3165)</i> I; <i>ksIs2[daf-7p::gfp, rol-6(su1006)]</i>                                    | FK181, RB2329         | Fig S1      |
| PY10894 | Ex[ <i>ttbk-3p::gfp, unc-122p::dsRed</i> ]                                                           | injected into WT      | Fig S2      |
| PY10895 | Ex[ <i>ttbk-4p::gfp, unc-122p::dsRed</i> ]                                                           | injected into WT      | Fig S2      |
| PY10896 | Ex[ <i>ttbk-5p::gfp, unc-122p::dsRed</i> ]                                                           | injected into WT      | Fig S2      |
| PY10897 | Ex[ <i>ttbk-6p::gfp, unc-122p::dsRed</i> ]                                                           | injected into WT      | Fig S2      |
| PY10898 | Ex[ <i>ttbk-7p::gfp, unc-122p::dsRed</i> ]                                                           | injected into WT      | Fig S2      |

---

<sup>a</sup>CGC – *Caenorhabditis* Genetics Center; NBRP – National BioResource Project

## REFERENCES

- Kim, K., K. Sato, M. Shibuya, D. M. Zeiger, R. A. Butcher *et al.*, 2009 Two chemoreceptors mediate developmental effects of dauer pheromone in *C. elegans*. *Science* **326**: 994-998.
- Peckol, E. L., E. R. Troemel and C. I. Bargmann, 2001 Sensory experience and sensory activity regulate chemosensory receptor gene expression in *C. elegans*. *Proc. Natl. Acad. Sci. USA* **98**: 11032-11038.
