# Supplementary material for: A Forward Genetic Screen for Molecules Involved in Pheromone-Induced Dauer Formation in Caenorhabditis elegans
Source: PubMed Central journal article supplement (PMC4856098; doi:10.1534/g3.115.026450), 2016-03-10
Supplement: supp_g3.115.026450_TableS2.pdf [file supp_g3.115.026450_TableS2.pdf]

**Table S2.** Dauer formation defects of *phd* mutants.

| Strain <sup>a</sup>               | EtOH <sup>c</sup> | Ascaroside <sup>b</sup> |               |               |               |               |               |               |               |               |               |               |               |               |               |               |
|-----------------------------------|-------------------|-------------------------|---------------|---------------|---------------|---------------|---------------|---------------|---------------|---------------|---------------|---------------|---------------|---------------|---------------|---------------|
|                                   |                   | ascr#2 (nM)             |               |               | ascr#3 (nM)   |               |               | ascr#5 (nM)   |               |               | ascr#8 (nM)   |               |               | icas#9 (nM)   |               |               |
|                                   | 0                 | 60                      | 600           | 6000          | 60            | 600           | 6000          | 60            | 600           | 6000          | 6             | 60            | 600           | 6             | 60            | 600           |
| WT                                | 0.03±<br>0.01     | 0.38±<br>0.05           | 0.61±<br>0.06 | 0.79±<br>0.03 | 0.48±<br>0.05 | 0.39±<br>0.04 | 0.82±<br>0.05 | 0.10±<br>0.06 | 0.83±<br>0.04 | 0.93±<br>0.03 | 0.28±<br>0.08 | 0.75±<br>0.07 | 0.87±<br>0.02 | 0.29±<br>0.03 | 0.66±<br>0.05 | 0.25±<br>0.02 |
| <i>kyIs128</i>                    | 0.02±<br>0.00     | 0.41±<br>0.08           | 0.64±<br>0.06 | 0.82±<br>0.01 | 0.48±<br>0.09 | 0.74±<br>0.06 | 0.94±<br>0.01 | 0.16±<br>0.03 | 0.88±<br>0.03 | 0.91±<br>0.04 | 0.39±<br>0.08 | 0.62±<br>0.09 | 0.85±<br>0.05 | 0.40±<br>0.12 | 0.52±<br>0.09 | 0.55±<br>0.20 |
| <i>srbc-64;</i><br><i>srbc-66</i> | 0.00±<br>0.00     | 0.09±<br>0.04           | 0.21±<br>0.08 | 0.33±<br>0.11 | 0.03±<br>0.01 | 0.05±<br>0.02 | 0.34±<br>0.15 | 0.01±<br>0.01 | 0.29±<br>0.15 | 0.62±<br>0.16 | 0.10±<br>0.06 | 0.30±<br>0.09 | 0.51±<br>0.09 | 0.01±<br>0.01 | 0.06±<br>0.04 | 0.07±<br>0.05 |
| <i>oy103</i>                      | 0.00±<br>0.00     | 0.03±<br>0.01           | 0.12±<br>0.03 | 0.28±<br>0.04 | 0.00±<br>0.00 | 0.01±<br>0.00 | 0.12±<br>0.05 | 0.02±<br>0.01 | 0.23±<br>0.13 | 0.79±<br>0.09 | 0.02±<br>0.01 | 0.11±<br>0.07 | 0.24±<br>0.06 | 0.03±<br>0.01 | 0.05±<br>0.01 | 0.02±<br>0.00 |
| <i>oy104</i>                      | 0.00±<br>0.00     | 0.12±<br>0.05           | 0.36±<br>0.07 | 0.29±<br>0.04 | 0.00±<br>0.00 | 0.00±<br>0.00 | 0.05±<br>0.02 | 0.00±<br>0.00 | 0.39±<br>0.20 | 0.65±<br>0.18 | 0.05±<br>0.04 | 0.38±<br>0.14 | 0.66±<br>0.09 | 0.01±<br>0.01 | 0.03±<br>0.02 | 0.01±<br>0.00 |
| <i>oy105</i>                      | 0.08±<br>0.03     | 0.22±<br>0.09           | 0.18±<br>0.10 | 0.25±<br>0.10 | 0.10±<br>0.02 | 0.15±<br>0.06 | 0.29±<br>0.16 | 0.05±<br>0.03 | 0.31±<br>0.17 | 0.39±<br>0.16 | 0.33±<br>0.17 | 0.44±<br>0.12 | 0.58±<br>0.15 | 0.09±<br>0.03 | 0.38±<br>0.13 | 0.24±<br>0.11 |
| <i>oy106</i>                      | 0.02±<br>0.02     | 0.02±<br>0.01           | 0.04±<br>0.01 | 0.20±<br>0.08 | 0.10±<br>0.09 | 0.13±<br>0.10 | 0.31±<br>0.19 | 0.03±<br>0.02 | 0.42±<br>0.07 | 0.80±<br>0.04 | 0.02±<br>0.01 | 0.17±<br>0.08 | 0.54±<br>0.18 | 0.03±<br>0.01 | 0.14±<br>0.06 | 0.39±<br>0.14 |
| <i>oy107</i>                      | 0.00±<br>0.00     | 0.13±<br>0.06           | 0.23±<br>0.06 | 0.34±<br>0.12 | 0.02±<br>0.02 | 0.16±<br>0.06 | 0.41±<br>0.09 | 0.02±<br>0.01 | 0.29±<br>0.15 | 0.70±<br>0.13 | 0.19±<br>0.06 | 0.41±<br>0.06 | 0.60±<br>0.08 | 0.06±<br>0.02 | 0.17±<br>0.02 | 0.10±<br>0.03 |
| <i>oy108</i>                      | 0.03±<br>0.01     | 0.15±<br>0.07           | 0.10±<br>0.04 | 0.29±<br>0.11 | 0.04±<br>0.02 | 0.07±<br>0.06 | 0.33±<br>0.22 | 0.13±<br>0.09 | 0.20±<br>0.09 | 0.54±<br>0.15 | 0.02±<br>0.01 | 0.35±<br>0.17 | 0.38±<br>0.16 | 0.00±<br>0.00 | 0.11±<br>0.08 | 0.03±<br>0.02 |
| <i>oy109</i>                      | 0.04±<br>0.03     | 0.02±<br>0.02           | 0.02±<br>0.01 | 0.04±<br>0.02 | 0.02±<br>0.01 | 0.02±<br>0.00 | 0.04±<br>0.01 | 0.06±<br>0.04 | 0.03±<br>0.01 | 0.07±<br>0.03 | 0.02±<br>0.01 | 0.03±<br>0.01 | 0.10±<br>0.04 | 0.02±<br>0.01 | 0.03±<br>0.00 | 0.01±<br>0.00 |

<sup>a</sup>All strains, except WT and *srbc-64; srbc-66*, contain stably integrated copies of the *str-3p::gfp* fusion gene (*kyIs128*).

<sup>b</sup>Shown are the mean±SEM proportion of dauers formed for the given strains and conditions at 25°C. Data are from at least 3 biologically independent trials of 40-110 animals per assay, with at least 2 technical replicates in each trial.

<sup>c</sup>Ethanol was used as the diluent for all tested ascarosides compounds.
