# Supplementary material for: A Forward Genetic Screen for Molecules Involved in Pheromone-Induced Dauer Formation in Caenorhabditis elegans
Source: PubMed Central journal article supplement (PMC4856098; doi:10.1534/g3.115.026450), 2016-03-10
Supplement: supp_g3.115.026450_TableS3.pdf [file supp_g3.115.026450_TableS3.pdf]

**Table S3.** Whole genome resequencing metrics.

| Metric                                 | Strain       |              |              |              |              |              |              |
|----------------------------------------|--------------|--------------|--------------|--------------|--------------|--------------|--------------|
|                                        | <i>oy103</i> | <i>oy104</i> | <i>oy105</i> | <i>oy106</i> | <i>oy107</i> | <i>oy108</i> | <i>oy109</i> |
| Average genome coverage <sup>a</sup>   | 29.7X        | 33.2X        | 23.1X        | 23.3X        | 32.6X        | 33.8X        | 36.8X        |
| Variants <sup>b</sup>                  | 3659         | 3783         | 3783         | 3767         | 3735         | 3670         | 4441         |
| Genic variants <sup>c</sup>            | 317          | 345          | 341          | 312          | 370          | 244          | 356          |
| Unique coding variants <sup>d</sup>    | 102          | 118          | 129          | 97           | 148          | 31           | 132          |
| Unique nonsense mutations <sup>e</sup> | 4            | 3            | 8            | 3            | 3            | 0            | 3            |
| Unique uncovered regions <sup>f</sup>  | 1            | 2            | 13           | 12           | 14           | 18           | 230          |

<sup>a</sup>Average depth of read coverage across unique regions in the genome.

<sup>b</sup>Total number of detected variants with respect to the N2 reference genome, including genic and intergenic regions. Only those variants that are supported by at least five overlapping consensus reads are reported in all cases.

<sup>c</sup>Variants in genic regions.

<sup>d</sup>Unique variants in coding regions present in individual genomes.

<sup>e</sup>Unique variants predicted to encode a premature termination codon in at least one isoform of a given locus in individual genomes.

<sup>f</sup>Genic regions lacking coverage in a given strain, but which are covered by reads in other sequenced strains.
